# Supplementary figures and images for: Cell therapy for ARDS: efficacy of endobronchial versus intravenous administration and biodistribution of MAPCs in a large animal model
Source: PubMed Central journal article supplement — BMJ Open Respir Res. 2019 Jan 12;6(1):e000308. doi: 10.1136/bmjresp-2018-000308 (PMC6339992; doi:10.1136/bmjresp-2018-000308), 2019-01-12

A

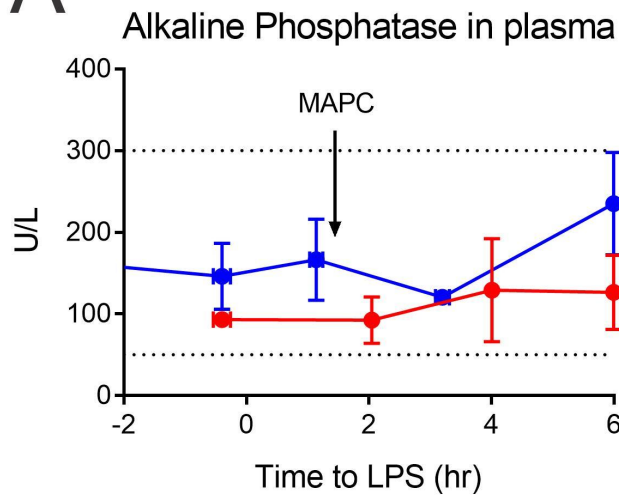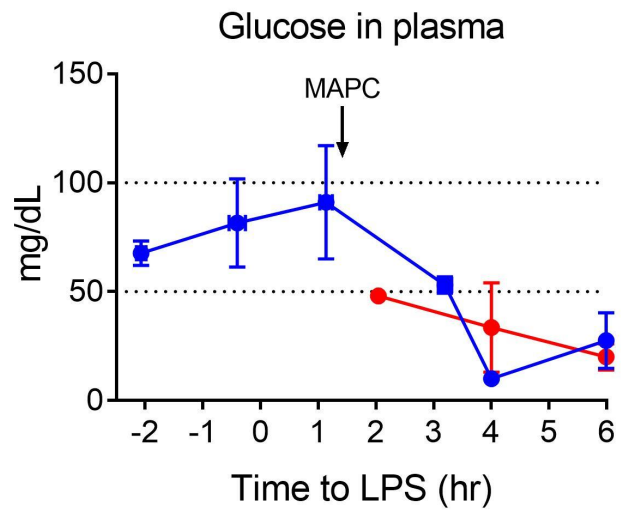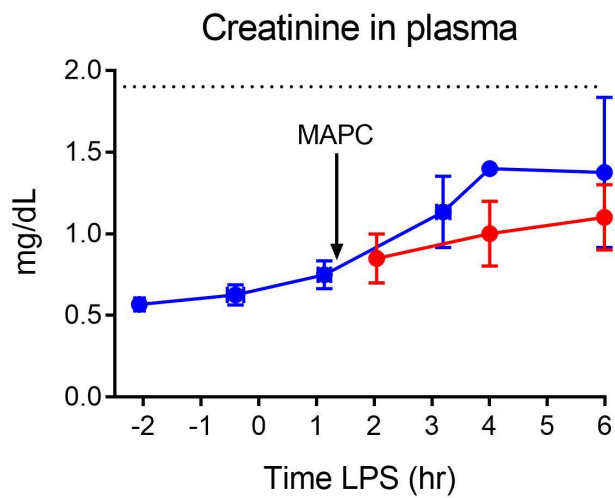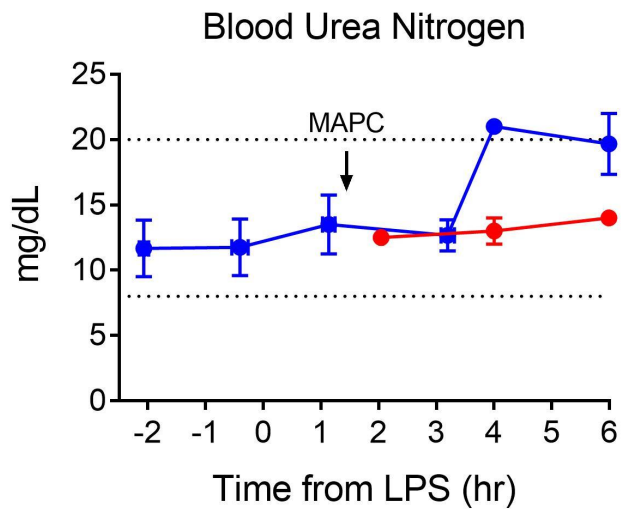

B

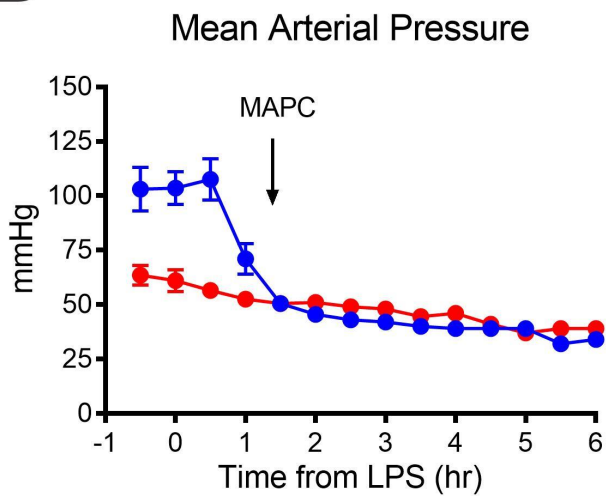

C

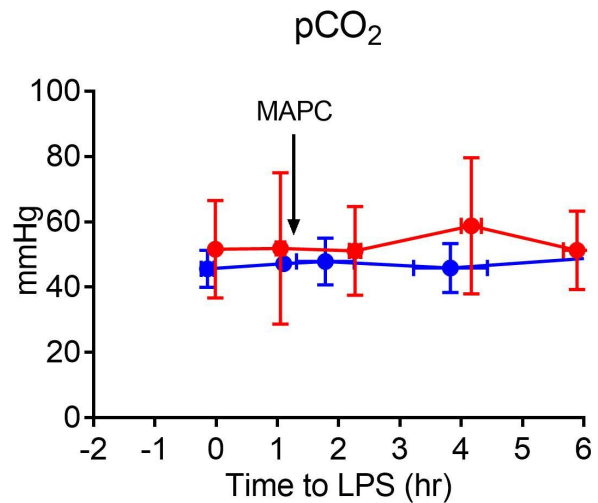

Supplement: bmjresp-2018-000308supp001.pdf [file bmjresp-2018-000308supp001.pdf]
